# Supplementary material for: Effect of Carbohydrate-Restricted Diets and Intermittent Fasting on Obesity, Type 2 Diabetes Mellitus, and Hypertension Management: Consensus Statement of the Korean Society for the Study of Obesity, Korean Diabetes Association, and Korean Society of Hypertension
Source: PubMed Central journal article supplement — Diabetes Metab J. 2022 May 25;46(3):355–76. doi: 10.4093/dmj.2022.0038 (PMC9171155; doi:10.4093/dmj.2022.0038), 2022-05-25
Supplement: dmj-2022-0038-suppl3.pdf [file dmj-2022-0038-suppl3.pdf]

**Supplementary Table 4.** Characteristics of randomized controlled trials included in the meta-analysis to evaluate the effects of intermittent fasting

| Study                             | Population | Nationality                | Duration of study | Control | Inter-vention | Follow-up loss rate (control: intervention), % | Subject number | Asian, % | FPG, mg/dL | TC, mg/dL | TG, mg/dL | LDL-C, mg/dL | HDL-C, mg/dL | BW, kg | BMI, kg/m <sup>2</sup> | HbA1c, % | SBP, mm Hg | DBP, mm Hg |
|-----------------------------------|------------|----------------------------|-------------------|---------|---------------|------------------------------------------------|----------------|----------|------------|-----------|-----------|--------------|--------------|--------|------------------------|----------|------------|------------|
| Barnosky et al. (2017) [82,83]    | Ob         | US                         | 6 mo              | CER     | ADF           | 17.1:26.4                                      | 100            | 2        | 90.0       | 187.0     | 98.0      | 111.0        | 56.0         | 96.0   | 35.0                   | NA       | 123.0      | 81.0       |
| Bowen et al. (2018) [84]          | Ob         | Australia                  | 4 mo              | CER     | ADF           | 16.0:18.3                                      | 163            | 0        | 97.3       | 201.1     | 124.0     | 127.6        | 50.3         | 100.1  | 35.6                   | NA       | 120.0      | 75.2       |
| Carter et al. (2018,2016) [85,86] | Ob         | Iran                       | 4 mo              | CER     | IER           | 7.5:5.0                                        | 75             | 100      | NA         | NA        | NA        | NA           | NA           | 88.3   | 31.3                   | NA       | 135.5      | 85.5       |
| Kunduraci et al. (2020) [87]      | Ob         | Turkey                     | 3 mo              | CER     | IER           | 5.7:8.6                                        | 65             | 100      | 117        | 228.5     | 204.8     | 147.7        | 44.6         | 92.9   | 34.7                   | 6.5      | 136.4      | 86.6       |
| Panizza et al. (2019) [88]        | Ob         | US (East Asians in Hawaii) | 3 mo              | DASH    | IER           | 7:13                                           | 60             | 100      | 103.3      | 243.5     | 133.7     | 183.6        | 35.1         | 80.2   | 30.7                   | NA       | 133.3      | 85.2       |
| Phillips et al. (2021) [89]       | Ob         | Swiss                      | 6 mo              | SD      | TRE           | 23.1:10.7                                      | 54             | 0        | 93.4       | NA        | 113.3     | NA           | 56.5         | 77.8   | 28.3                   | 5.27     | 125        | 80.1       |
| Razavi et al. (2021) [90]         | T2DM/Ob    | Australia                  | 1 yr              | CER     | ADF           | 31.3:27.1                                      | 137            | NA       | 153.0      | 186.0     | 147.0     | 111.0        | 47.0         | 101.0  | 36.0                   | 7.3      | NA         | NA         |
| Varady et al. (2013) [91]         | Ob         | US                         | 3 mo              | SD      | ADF           | 6.3:6.3                                        | 30             | 0        | NA         | 206.0     | 108.5     | 123.0        | 56.5         | 77.0   | 26.0                   | NA       | 121.5      | 80.0       |

FPG, fasting plasma glucose; TC, total cholesterol; TG, triglyceride; LDL-C, low-density lipoprotein cholesterol; HDL-C, high-density lipoprotein cholesterol; BW, body weight; BMI, body mass index; HbA1c, glycosylated hemoglobin; SBP, systolic blood pressure; DBP, diastolic blood pressure; Ob, obesity or overweight; CER, continuous energy restriction; ADF, alternate-day fasting; NA, not available; IER, intermittent energy restriction; DASH, dietary approaches to stop hypertension diet; SD, standard diet; TRE, time-restricted eating; T2DM, type 2 diabetes.
