# Supplementary material for: Effect of Carbohydrate-Restricted Diets and Intermittent Fasting on Obesity, Type 2 Diabetes Mellitus, and Hypertension Management: Consensus Statement of the Korean Society for the Study of Obesity, Korean Diabetes Association, and Korean Society of Hypertension
Source: PubMed Central journal article supplement — Diabetes Metab J. 2022 May 25;46(3):355–76. doi: 10.4093/dmj.2022.0038 (PMC9171155; doi:10.4093/dmj.2022.0038), 2022-05-25
Supplement: dmj-2022-0038-suppl7.pdf [file dmj-2022-0038-suppl7.pdf]

**Supplementary Table 8.** Quality of the evidence assessment for included studies evaluating the effects of IF in adults with overweight/obesity

| No. of studies                                                                       | Quality assessment |                         |                          |              |             |                      | Effect |         |                   | Quality                                  |          |
|--------------------------------------------------------------------------------------|--------------------|-------------------------|--------------------------|--------------|-------------|----------------------|--------|---------|-------------------|------------------------------------------|----------|
|                                                                                      | Design             | Risk of bias            | Inconsistency            | Indirectness | Imprecision | Other considerations | IF     | Control | Relative (95% CI) |                                          | Absolute |
| <b>HbA1c (follow-up 12–24 wk; better indicated by lower values)</b>                  |                    |                         |                          |              |             |                      |        |         |                   |                                          |          |
| 3                                                                                    | Randomized trials  | Serious                 | No serious inconsistency | Serious      | Serious     | None                 | 88     | 85      | -                 | MD, 0.11 higher (0.04 lower–0.26 higher) | Very low |
| <b>Fasting glucose, mg/dL (follow-up 12–24 wk; better indicated by lower values)</b> |                    |                         |                          |              |             |                      |        |         |                   |                                          |          |
| 5                                                                                    | Randomized trials  | No serious risk of bias | No serious inconsistency | Serious      | Serious     | None                 | 179    | 180     | -                 | MD, 0.89 lower (4.3 lower–2.53 higher)   | Low      |
| <b>Fasting insulin, µU/mL (follow-up 12–24 wk; better indicated by lower values)</b> |                    |                         |                          |              |             |                      |        |         |                   |                                          |          |
| 4                                                                                    | Randomized trials  | No serious risk of bias | No serious inconsistency | Serious      | Serious     | None                 | 154    | 160     | -                 | MD, 0.43 lower (1.99 lower–1.14 higher)  | Low      |
| <b>BW, kg (follow-up 12–24 wk; better indicated by lower values)</b>                 |                    |                         |                          |              |             |                      |        |         |                   |                                          |          |
| 8                                                                                    | Randomized trials  | Serious                 | No serious inconsistency | Serious      | Serious     | None                 | 274    | 280     | -                 | MD, 1.22 lower (3.49 lower–1.05 higher)  | Very low |
| <b>HOMA-IR (follow-up 12–24 wk; better indicated by lower values)</b>                |                    |                         |                          |              |             |                      |        |         |                   |                                          |          |
| 2                                                                                    | Randomized trials  | Serious                 | No serious inconsistency | Serious      | Serious     | None                 | 57     | 62      | -                 | MD, 0.22 lower (1.48 lower–1.05 higher)  | Very low |
| <b>BMI, kg/m<sup>2</sup> (follow-up 12–24 wk; better indicated by lower values)</b>  |                    |                         |                          |              |             |                      |        |         |                   |                                          |          |
| 5                                                                                    | Randomized trials  | No serious risk of bias | No serious inconsistency | Serious      | Serious     | None                 | 192    | 188     | -                 | MD, 0.49 lower (1.13 lower–0.14 higher)  | Very low |
| <b>BW, kg (follow-up 12–24 wk; better indicated by lower values)</b>                 |                    |                         |                          |              |             |                      |        |         |                   |                                          |          |
| 8                                                                                    | Randomized trials  | No serious risk of bias | No serious inconsistency | Serious      | Serious     | None                 | 274    | 280     | -                 | MD, 1.22 lower (3.49 lower–1.05 higher)  | Low      |
| <b>WC, cm (follow-up 12–24 wk; better indicated by lower values)</b>                 |                    |                         |                          |              |             |                      |        |         |                   |                                          |          |
| 3                                                                                    | Randomized trials  | Serious                 | No serious inconsistency | Serious      | Serious     | None                 | 93     | 87      | -                 | MD, 1.95 lower (4.09 lower–0.2 higher)   | Very low |
| <b>SBP, mm Hg (follow-up 12–24 wk; better indicated by lower values)</b>             |                    |                         |                          |              |             |                      |        |         |                   |                                          |          |
| 6                                                                                    | Randomized trials  | No serious risk of bias | Serious                  | Serious      | Serious     | None                 | 203    | 201     | -                 | MD, 0.87 higher (2.56 lower–4.39 higher) | Very low |
| <b>DBP, mm Hg (follow-up 12–24 wk; better indicated by lower values)</b>             |                    |                         |                          |              |             |                      |        |         |                   |                                          |          |
| 6                                                                                    | Randomized trials  | No serious risk of bias | Serious                  | Serious      | Serious     | None                 | 203    | 201     | -                 | MD, 0.16 lower (2.89 lower–2.56 higher)  | Very low |

(Continued to the next page)

Supplementary Table 8. Continued

| No. of studies                                                           | Design            | Risk of bias | Quality assessment       |              |             |                      | No. of patients |         | Effect            |                                           | Quality  |
|--------------------------------------------------------------------------|-------------------|--------------|--------------------------|--------------|-------------|----------------------|-----------------|---------|-------------------|-------------------------------------------|----------|
|                                                                          |                   |              | Inconsistency            | Indirectness | Imprecision | Other considerations | IF              | Control | Relative (95% CI) | Absolute                                  |          |
| Fat free mass, kg (follow-up 12–24 wk; better indicated by lower values) |                   |              |                          |              |             |                      |                 |         |                   |                                           |          |
| 8                                                                        | Randomized trials | Serious      | No serious inconsistency | Serious      | Serious     | None                 | 269             | 271     | -                 | MD, 0.36 lower (0.87 lower–0.16 higher)   | Very low |
| Fat mass, kg (follow-up 12–24 wk; better indicated by lower values)      |                   |              |                          |              |             |                      |                 |         |                   |                                           |          |
| 8                                                                        | Randomized trials | Serious      | No serious inconsistency | Serious      | Serious     | None                 | 269             | 271     | -                 | MD, 0.67 lower (1.95 lower–0.62 higher)   | Very low |
| Fat mass, % (follow-up 12–24 wk; better indicated by lower values)       |                   |              |                          |              |             |                      |                 |         |                   |                                           |          |
| 3                                                                        | Randomized trials | Serious      | No serious inconsistency | Serious      | Serious     | None                 | 73              | 69      | -                 | MD, 0.27 higher (0.48 lower–1.01 higher)  | Very low |
| HDL-C, mg/dL (follow-up 12–24 wk; better indicated by higher values)     |                   |              |                          |              |             |                      |                 |         |                   |                                           |          |
| 6                                                                        | Randomized trials | Serious      | No serious inconsistency | Serious      | Serious     | None                 | 218             | 214     | -                 | MD, 0.17 lower (3.27 lower–2.89 higher)   | Very low |
| LDL-C, mg/dL (follow-up 12–24 wk; better indicated by lower values)      |                   |              |                          |              |             |                      |                 |         |                   |                                           |          |
| 5                                                                        | Randomized trials | Serious      | No serious inconsistency | Serious      | Serious     | None                 | 193             | 194     | -                 | MD, 0.24 lower (5.08 lower–4.59 higher)   | Very low |
| TG, mg/dL (follow-up 12–24 wk; better indicated by lower values)         |                   |              |                          |              |             |                      |                 |         |                   |                                           |          |
| 6                                                                        | Randomized trials | Serious      | No serious inconsistency | Serious      | Serious     | None                 | 218             | 214     | -                 | MD, 1.51 lower (17.06 lower–14.04 higher) | Very low |
| HbA1c (Copy; follow-up 12–24 wk; better indicated by lower values)       |                   |              |                          |              |             |                      |                 |         |                   |                                           |          |
| 3                                                                        | Randomized trials | Serious      | No serious inconsistency | Serious      | Serious     | None                 | 88              | 85      | -                 | MD, 0.11 higher (0.04 lower–0.26 higher)  | Very low |
| BW, kg (Copy; follow-up 12–24 wk; better indicated by lower values)      |                   |              |                          |              |             |                      |                 |         |                   |                                           |          |
| 8                                                                        | Randomized trials | Serious      | No serious inconsistency | Serious      | Serious     | None                 | 274             | 280     | -                 | MD, 1.22 lower (3.49 lower–1.05 higher)   | Very low |

IF, intermittent fasting; CI, confidence interval; HbA1c, glycosylated hemoglobin; MD, mean difference; BW, body weight; HOMA-IR, homeostatic model assessment for insulin resistance; BMI, body mass index; WC, waist circumference; SBP, systolic blood pressure; HDL-C, high-density lipoprotein cholesterol; LDL-C, low-density lipoprotein cholesterol; TG, triglyceride.
