# Supplementary material for: Effect of Carbohydrate-Restricted Diets and Intermittent Fasting on Obesity, Type 2 Diabetes Mellitus, and Hypertension Management: Consensus Statement of the Korean Society for the Study of Obesity, Korean Diabetes Association, and Korean Society of Hypertension
Source: PubMed Central journal article supplement — Diabetes Metab J. 2022 May 25;46(3):355–76. doi: 10.4093/dmj.2022.0038 (PMC9171155; doi:10.4093/dmj.2022.0038), 2022-05-25
Supplement: dmj-2022-0038-suppl8.pdf [file dmj-2022-0038-suppl8.pdf]

**Supplementary Table 9.** Quality of the evidence assessment for included studies evaluating the effects of carbohydrate-restricted diets in adults with diabetes: mLCD

| No. of studies                                                               | Quality assessment |              |                          |                         |                        |                      |      | No. of patients |                   | Effect                                  |          | Quality |
|------------------------------------------------------------------------------|--------------------|--------------|--------------------------|-------------------------|------------------------|----------------------|------|-----------------|-------------------|-----------------------------------------|----------|---------|
|                                                                              | Design             | Risk of bias | Inconsistency            | Indirectness            | Imprecision            | Other considerations | mLCD | Control         | Relative (95% CI) | Absolute                                |          |         |
| <b>HbA1c (follow-up 8–24 wk; better indicated by lower values)</b>           |                    |              |                          |                         |                        |                      |      |                 |                   |                                         |          |         |
| 10                                                                           | Randomized trials  | Serious      | No serious inconsistency | No serious indirectness | No serious imprecision | None                 | 383  | 375             | -                 | MD, 0.21 lower (0.32–0.10 lower)        | Moderate |         |
| <b>HOMA-IR (follow-up 8–24 wk; better indicated by lower values)</b>         |                    |              |                          |                         |                        |                      |      |                 |                   |                                         |          |         |
| 10                                                                           | Randomized trials  | Serious      | No serious inconsistency | Serious                 | Serious                | Reporting bias       | 128  | 120             | -                 | MD, 0.53 lower (0.96–0.11 lower)        | Very low |         |
| <b>Fasting glucose (follow-up 8–24 wk; better indicated by lower values)</b> |                    |              |                          |                         |                        |                      |      |                 |                   |                                         |          |         |
| 6                                                                            | Randomized trials  | Serious      | No serious inconsistency | No serious indirectness | Serious                | None                 | 172  | 165             | -                 | MD, 9.88 lower (18.04–1.71 lower)       | Low      |         |
| <b>Fasting insulin (follow-up 8–24 wk; better indicated by lower values)</b> |                    |              |                          |                         |                        |                      |      |                 |                   |                                         |          |         |
| 3                                                                            | Randomized trials  | Serious      | No serious inconsistency | No serious indirectness | Serious                | None                 | 128  | 120             | -                 | MD, 2.11 lower (3.70–0.52 lower)        | Low      |         |
| <b>BW (follow-up 8–24 wk; better indicated by lower values)</b>              |                    |              |                          |                         |                        |                      |      |                 |                   |                                         |          |         |
| 8                                                                            | Randomized trials  | Serious      | No serious inconsistency | No serious indirectness | Serious                | None                 | 320  | 299             | -                 | MD, 1.54 lower (3.11 lower–0.02 higher) | Low      |         |
| <b>SBP, mm Hg (follow-up 8–24 wk; better indicated by lower values)</b>      |                    |              |                          |                         |                        |                      |      |                 |                   |                                         |          |         |
| 6                                                                            | Randomized trials  | Serious      | No serious inconsistency | No serious indirectness | No serious imprecision | None                 | 262  | 248             | -                 | MD, 2.99 lower (5.48–0.49 lower)        | Moderate |         |
| <b>DBP, mm Hg (follow-up 8–24 wk; better indicated by lower values)</b>      |                    |              |                          |                         |                        |                      |      |                 |                   |                                         |          |         |
| 6                                                                            | Randomized trials  | Serious      | No serious inconsistency | No serious indirectness | Serious                | None                 | 266  | 247             | -                 | MD, 1.07 lower (2.43 lower–0.29 higher) | Low      |         |
| <b>TG, mg/dL (follow-up 8–24 wk; better indicated by lower values)</b>       |                    |              |                          |                         |                        |                      |      |                 |                   |                                         |          |         |
| 10                                                                           | Randomized trials  | Serious      | No serious inconsistency | No serious indirectness | No serious imprecision | Reporting bias       | 380  | 362             | -                 | MD, 17.22 lower (34.27–0.18 lower)      | Low      |         |

(Continued to the next page)

Supplementary Table 9. Continued

| No. of studies                                                     | Design            | Quality assessment |                          |                         |                        | No. of patients      |      | Effect  |                   | Quality                                     |          |
|--------------------------------------------------------------------|-------------------|--------------------|--------------------------|-------------------------|------------------------|----------------------|------|---------|-------------------|---------------------------------------------|----------|
|                                                                    |                   | Risk of bias       | Inconsistency            | Indirectness            | Imprecision            | Other considerations | mLCD | Control | Relative (95% CI) |                                             | Absolute |
| LDL-C, mg/dL (follow-up 8–24 wk; better indicated by lower values) |                   |                    |                          |                         |                        |                      |      |         |                   |                                             |          |
| 8                                                                  | Randomized trials | Serious            | No serious inconsistency | No serious indirectness | Serious                | None                 | 308  | 299     | -                 | MD, 0.35 higher (3.03 lower to 3.72 higher) | Low      |
| HDL-C, mg/dL (follow-up 8–24 wk; better indicated by lower values) |                   |                    |                          |                         |                        |                      |      |         |                   |                                             |          |
| 8                                                                  | Randomized trials | Serious            | No serious inconsistency | No serious indirectness | No serious imprecision | None                 | 283  | 264     | -                 | MD, 2.30 higher (0.23–4.37 higher)          | Moderate |

mLCD, moderately-low or low carbohydrate diet; CI, confidence interval; HD, homeostatic model assessment for insulin resistance; BW, body weight; SBP, systolic blood pressure; DBP, diastolic blood pressure; TG, triglyceride; LDL-C, low-density lipoprotein cholesterol; HDL-C, high-density lipoprotein cholesterol.
