# Supplementary material for: Effect of Carbohydrate-Restricted Diets and Intermittent Fasting on Obesity, Type 2 Diabetes Mellitus, and Hypertension Management: Consensus Statement of the Korean Society for the Study of Obesity, Korean Diabetes Association, and Korean Society of Hypertension
Source: PubMed Central journal article supplement — Diabetes Metab J. 2022 May 25;46(3):355–76. doi: 10.4093/dmj.2022.0038 (PMC9171155; doi:10.4093/dmj.2022.0038), 2022-05-25
Supplement: dmj-2022-0038-suppl9.pdf [file dmj-2022-0038-suppl9.pdf]

**Supplementary Table 10.** Quality of the evidence assessment for included studies evaluating the effects of carbohydrate-restricted diets in adults with diabetes: VLCD

| No. of studies                                                               | Design            | Risk of bias | Quality assessment       |                         |                        |                      | No. of patients |         | Effect            |                                           | Quality  |
|------------------------------------------------------------------------------|-------------------|--------------|--------------------------|-------------------------|------------------------|----------------------|-----------------|---------|-------------------|-------------------------------------------|----------|
|                                                                              |                   |              | Inconsistency            | Indirectness            | Imprecision            | Other considerations | VLCD            | Control | Relative (95% CI) | Absolute                                  |          |
| HbA1c (follow-up mean 24 wks; better indicated by lower values)              |                   |              |                          |                         |                        |                      |                 |         |                   |                                           |          |
| 5                                                                            | Randomized trials | Serious      | No serious inconsistency | No serious indirectness | No serious imprecision | None                 | 161             | 160     | -                 | MD, 0.32 lower (0.57–0.06 lower)          | Moderate |
| HOMA-IR (follow-up mean 12–24 wks; better indicated by lower values)         |                   |              |                          |                         |                        |                      |                 |         |                   |                                           |          |
| 2                                                                            | Randomized trials | Serious      | No serious inconsistency | No serious indirectness | Serious                | None                 | 61              | 58      | -                 | MD, 1.07 lower (3.13 lower–0.98 higher)   | Low      |
| Fasting glucose (follow-up mean 12–24 wks; better indicated by lower values) |                   |              |                          |                         |                        |                      |                 |         |                   |                                           |          |
| 3                                                                            | Randomized trials | Serious      | No serious inconsistency | No serious indirectness | Serious                | None                 | 135             | 132     | -                 | MD, 9.64 lower (19.54 lower–0.26 higher)  | Low      |
| BW (follow-up mean 12–24 wks; better indicated by lower values)              |                   |              |                          |                         |                        |                      |                 |         |                   |                                           |          |
| 4                                                                            | Randomized trials | Serious      | No serious inconsistency | No serious indirectness | No serious imprecision | None                 | 147             | 144     | -                 | MD, 3.84 lower (7.55–0.13 lower)          | Moderate |
| Fasting insulin (better indicated by lower values)                           |                   |              |                          |                         |                        |                      |                 |         |                   |                                           |          |
| 1                                                                            | Randomized trials | Serious      | No serious inconsistency | No serious indirectness | Serious                | None                 | 16              | 18      | -                 | MD, 2.80 lower (5.84 lower–0.24 higher)   | Low      |
| SBP, mm Hg (better indicated by lower values)                                |                   |              |                          |                         |                        |                      |                 |         |                   |                                           |          |
| 3                                                                            | Randomized trials | Serious      | No serious inconsistency | No serious indirectness | Serious                | None                 | 106             | 112     | -                 | MD, 0.34 higher (3.61 lower–4.28 higher)  | Low      |
| DBP, mm Hg (better indicated by lower values)                                |                   |              |                          |                         |                        |                      |                 |         |                   |                                           |          |
| 3                                                                            | Randomized trials | Serious      | No serious inconsistency | No serious indirectness | Serious                | None                 | 106             | 112     | -                 | MD, 1.38 higher (0.90 lower–3.67 higher)  | Low      |
| TG, mg/dL (better indicated by lower values)                                 |                   |              |                          |                         |                        |                      |                 |         |                   |                                           |          |
| 5                                                                            | Randomized trials | Serious      | No serious inconsistency | No serious indirectness | Serious                | None                 | 158             | 155     | -                 | MD, 11.40 lower (27.01 lower–4.22 higher) | Low      |
| LDL-C, mg/dL (better indicated by lower values)                              |                   |              |                          |                         |                        |                      |                 |         |                   |                                           |          |
| 4                                                                            | Randomized trials | Serious      | No serious inconsistency | No serious indirectness | No serious imprecision | None                 | 139             | 138     | -                 | MD, 7.19 higher (0.02–14.36 higher)       | Moderate |
| HDL-C, mg/dL (better indicated by lower values)                              |                   |              |                          |                         |                        |                      |                 |         |                   |                                           |          |
| 5                                                                            | Randomized trials | Serious      | No serious inconsistency | No serious indirectness | Serious                | None                 | 158             | 154     | -                 | MD, 0.43 higher (1.98 lower–2.84 higher)  | Low      |

VLCD, very-low carbohydrate diet; CI, confidence interval; HbA1c, glycosylated hemoglobin; MD, mean difference; HOMA-IR, homeostatic model assessment for insulin resistance; BW, body weight; SBP, systolic blood pressure; DBP, diastolic blood pressure; TG, triglyceride; LDL-C, low-density lipoprotein cholesterol; HDL-C, high-density lipoprotein cholesterol.
