# Supplementary material for: Effect of Carbohydrate-Restricted Diets and Intermittent Fasting on Obesity, Type 2 Diabetes Mellitus, and Hypertension Management: Consensus Statement of the Korean Society for the Study of Obesity, Korean Diabetes Association, and Korean Society of Hypertension
Source: PubMed Central journal article supplement — Diabetes Metab J. 2022 May 25;46(3):355–76. doi: 10.4093/dmj.2022.0038 (PMC9171155; doi:10.4093/dmj.2022.0038), 2022-05-25
Supplement: dmj-2022-0038-suppl10.pdf [file dmj-2022-0038-suppl10.pdf]

**Supplementary Table 11.** Quality of the evidence assessment for included studies evaluating the effects of carbohydrate-restricted diets in adults with hypertension: mLCD

| No. of studies                                                   | Design            | Quality assessment |                          |              |             | No. of patients      |      | Effect  |                   | Quality                                  |          |
|------------------------------------------------------------------|-------------------|--------------------|--------------------------|--------------|-------------|----------------------|------|---------|-------------------|------------------------------------------|----------|
|                                                                  |                   | Risk of bias       | Inconsistency            | Indirectness | Imprecision | Other considerations | mLCD | Control | Relative (95% CI) |                                          | Absolute |
| SBP, mm Hg (follow-up 8–24 wk; better indicated by lower values) |                   |                    |                          |              |             |                      |      |         |                   |                                          |          |
| 2                                                                | Randomized trials | Serious            | No serious inconsistency | Serious      | Serious     | None                 | 97   | 98      | -                 | MD, 3.25 lower (7.28 lower–0.77 higher)  | Very low |
| DBP, mm Hg (follow-up 8–24 wk; better indicated by lower values) |                   |                    |                          |              |             |                      |      |         |                   |                                          |          |
| 1                                                                | Randomized trials | Serious            | No serious inconsistency | Serious      | Serious     | None                 | 46   | 47      | -                 | MD, 1.80 lower (4.56 lower–0.96 higher)  | Very low |
| LDL-C (follow-up 8–24 wk; better indicated by lower values)      |                   |                    |                          |              |             |                      |      |         |                   |                                          |          |
| 1                                                                | Randomized trials | Serious            | No serious inconsistency | Serious      | Serious     | None                 | 46   | 47      | -                 | MD, 0.00 higher (9.55 lower–9.55 higher) | Very low |
| TG (follow-up 8–24 wk; better indicated by lower values)         |                   |                    |                          |              |             |                      |      |         |                   |                                          |          |
| 2                                                                | Randomized trials | Serious            | No serious inconsistency | Serious      | Serious     | None                 | 97   | 98      | -                 | MD, 35.58 lower (52.84–18.33 lower)      | Very low |
| BW, kg (follow-up 8–24 wk; better indicated by lower values)     |                   |                    |                          |              |             |                      |      |         |                   |                                          |          |
| 2                                                                | Randomized trials | Serious            | No serious inconsistency | Serious      | Serious     | None                 | 97   | 98      | -                 | MD, 1.81 lower (3.93 lower–0.30 higher)  | Very low |
| HDL-C (follow-up 36–52 wk; better indicated by higher values)    |                   |                    |                          |              |             |                      |      |         |                   |                                          |          |
| 1                                                                | Randomized trials | Serious            | No serious inconsistency | Serious      | Serious     | None                 | 46   | 47      | -                 | MD, 1.60 higher (1.13 lower–4.33 higher) | Very low |
| FMD (follow-up 36–52 wk; better indicated by lower values)       |                   |                    |                          |              |             |                      |      |         |                   |                                          |          |
| 1                                                                | Randomized trials | Serious            | No serious inconsistency | Serious      | Serious     | None                 | 46   | 47      | -                 | MD, 0.30 higher (0.58 lower–1.18 higher) | Very low |

mLCD, moderately-low or low carbohydrate diet; CI, confidence interval; SBP, systolic blood pressure; MD, mean difference; DBP, diastolic blood pressure; LDL-C, low-density lipoprotein cholesterol; TG, triglyceride; BW, body weight; HDL-C, high-density lipoprotein cholesterol; FMD, flow-mediated dilation.
