# Supplementary material for: Effect of Carbohydrate-Restricted Diets and Intermittent Fasting on Obesity, Type 2 Diabetes Mellitus, and Hypertension Management: Consensus Statement of the Korean Society for the Study of Obesity, Korean Diabetes Association, and Korean Society of Hypertension
Source: PubMed Central journal article supplement — Diabetes Metab J. 2022 May 25;46(3):355–76. doi: 10.4093/dmj.2022.0038 (PMC9171155; doi:10.4093/dmj.2022.0038), 2022-05-25
Supplement: dmj-2022-0038-suppl13.pdf [file dmj-2022-0038-suppl13.pdf]

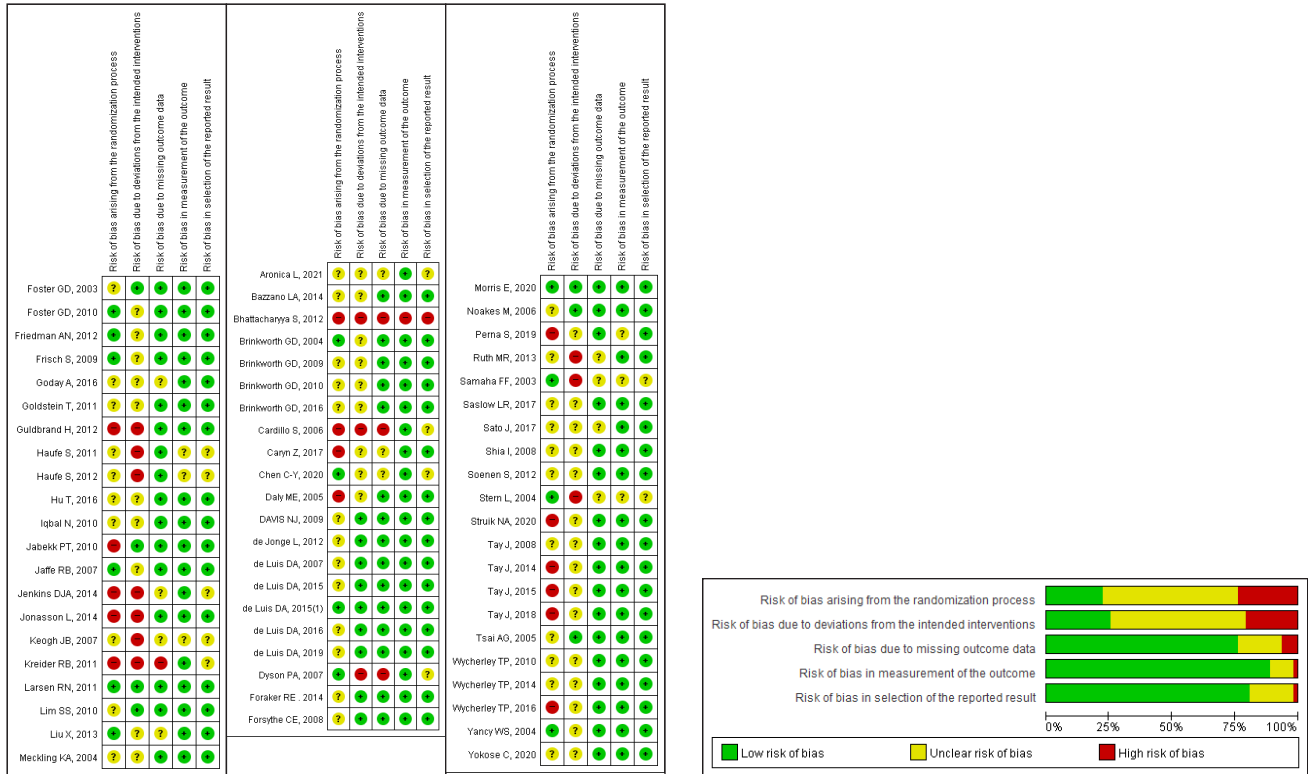

Supplementary Fig. 2. Risk of bias assessment in studies evaluating the effects of carbohydrate-restricted diets in adults with overweight/obesity.
