# Supplementary material for: Effect of Carbohydrate-Restricted Diets and Intermittent Fasting on Obesity, Type 2 Diabetes Mellitus, and Hypertension Management: Consensus Statement of the Korean Society for the Study of Obesity, Korean Diabetes Association, and Korean Society of Hypertension
Source: PubMed Central journal article supplement — Diabetes Metab J. 2022 May 25;46(3):355–76. doi: 10.4093/dmj.2022.0038 (PMC9171155; doi:10.4093/dmj.2022.0038), 2022-05-25
Supplement: dmj-2022-0038-suppl16.pdf [file dmj-2022-0038-suppl16.pdf]

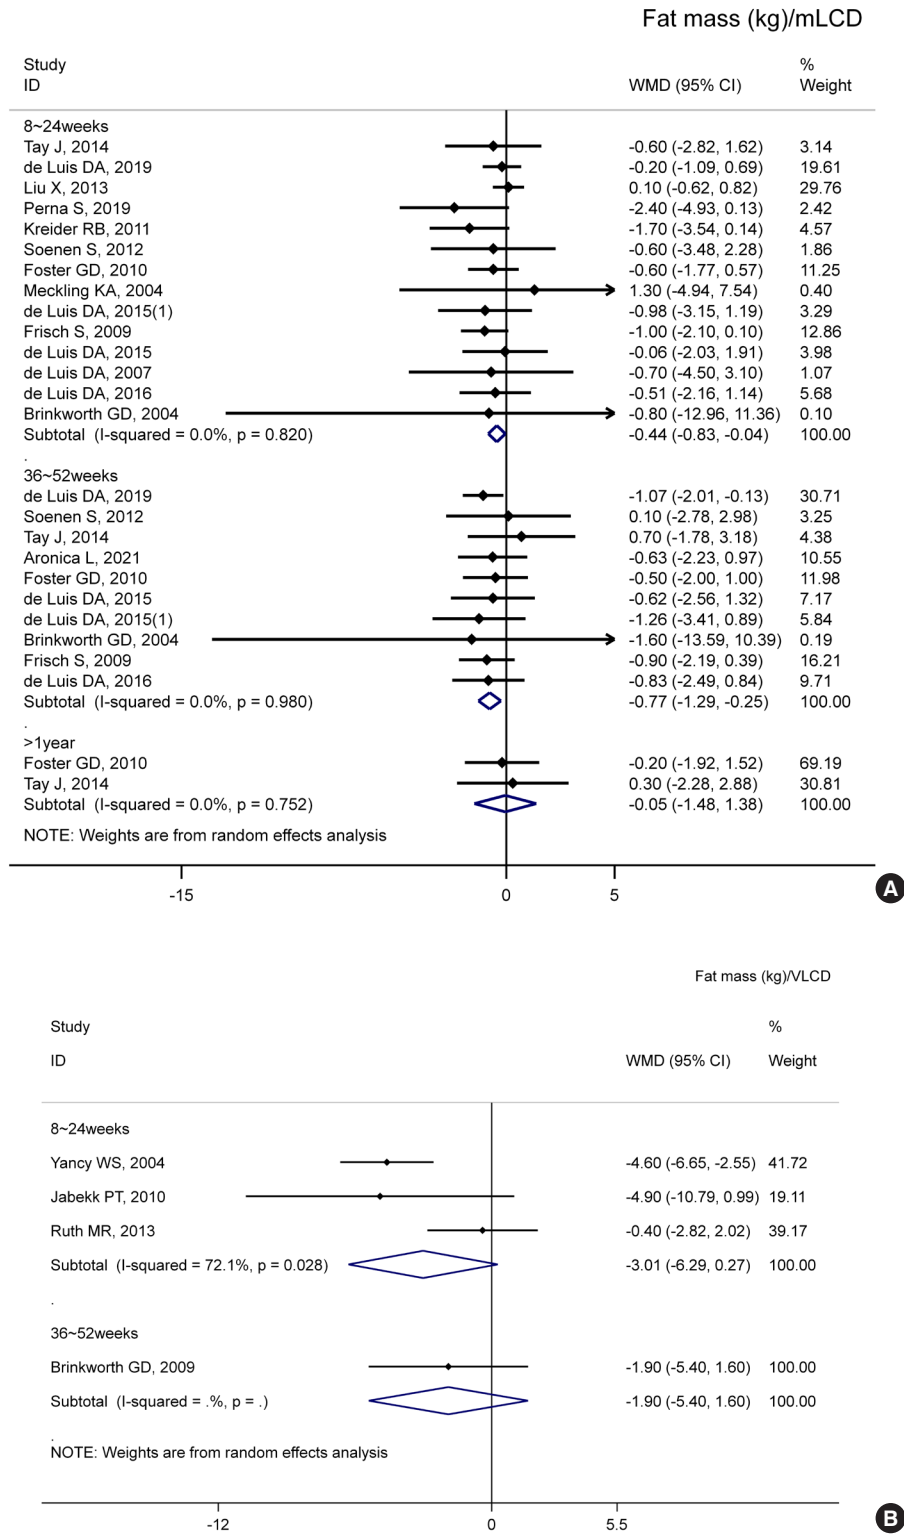

**Supplementary Fig. 5.** Effects of carbohydrate-restricted diets on fat mass in adults with overweight/obesity. (A) Moderately-low or low carbohydrate diet (mLCD). (B) Very-low carbohydrate diet (VLCD). WMD, weighted mean difference; CI, confidence interval.
