# Supplementary material for: Effect of Carbohydrate-Restricted Diets and Intermittent Fasting on Obesity, Type 2 Diabetes Mellitus, and Hypertension Management: Consensus Statement of the Korean Society for the Study of Obesity, Korean Diabetes Association, and Korean Society of Hypertension
Source: PubMed Central journal article supplement — Diabetes Metab J. 2022 May 25;46(3):355–76. doi: 10.4093/dmj.2022.0038 (PMC9171155; doi:10.4093/dmj.2022.0038), 2022-05-25
Supplement: dmj-2022-0038-suppl19.pdf [file dmj-2022-0038-suppl19.pdf]

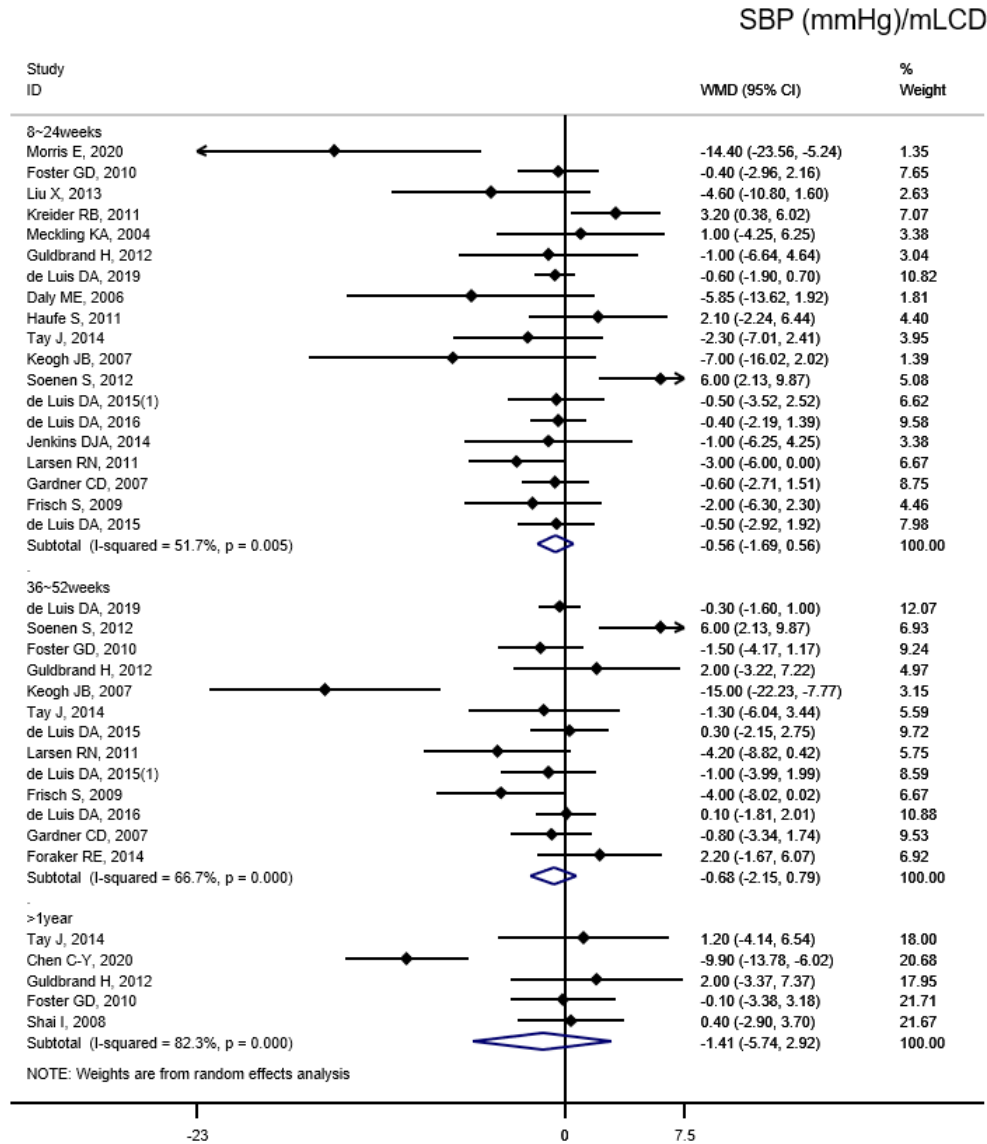

A

**Supplementary Fig. 8.** Effects of carbohydrate-restricted diets on blood pressure in adults with overweight/obesity. (A) Moderately-low or low carbohydrate diet (mLCD) on systolic blood pressure (SBP). (B) mLCD on diastolic blood pressure (DBP). (C) Very-low carbohydrate diet (VLCD) on SBP. (D) VLCD on DBP. WMD, weighted mean difference; CI, confidence interval.

(Continued to the next page)

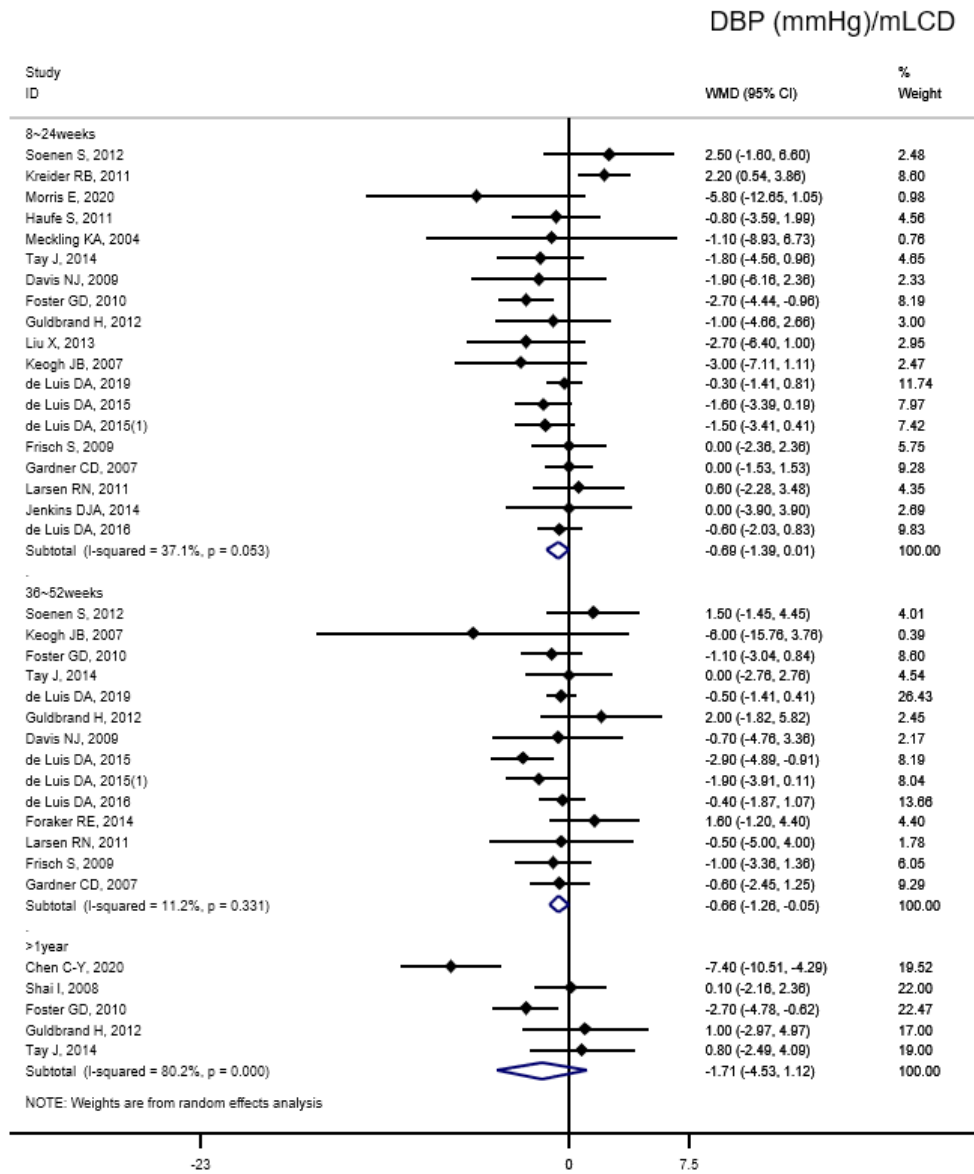

Supplementary Fig. 8. Continued.

(Continued to the next page)

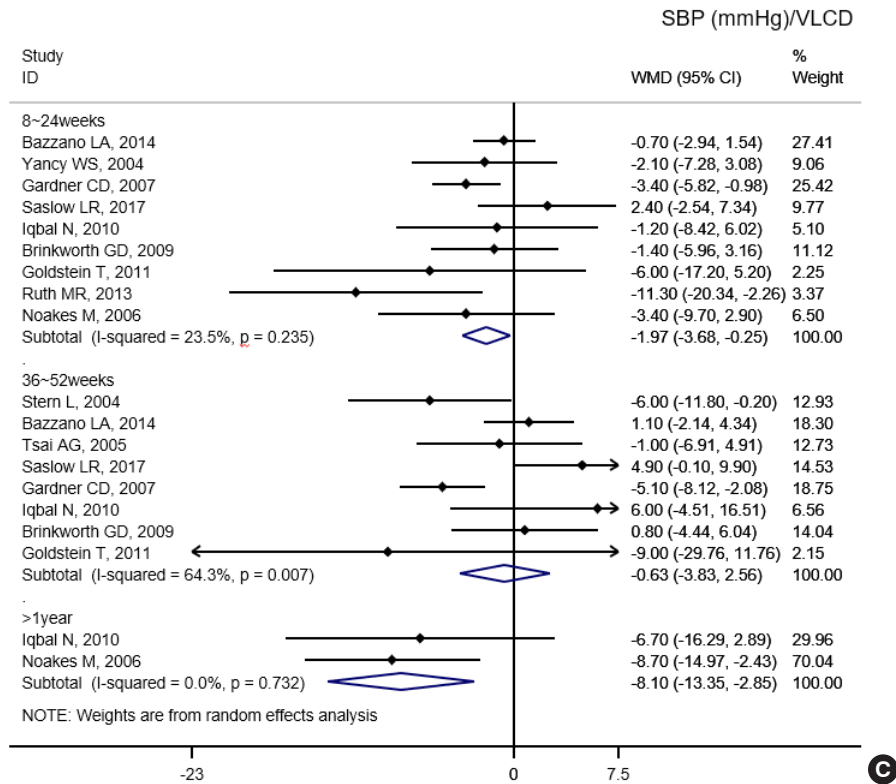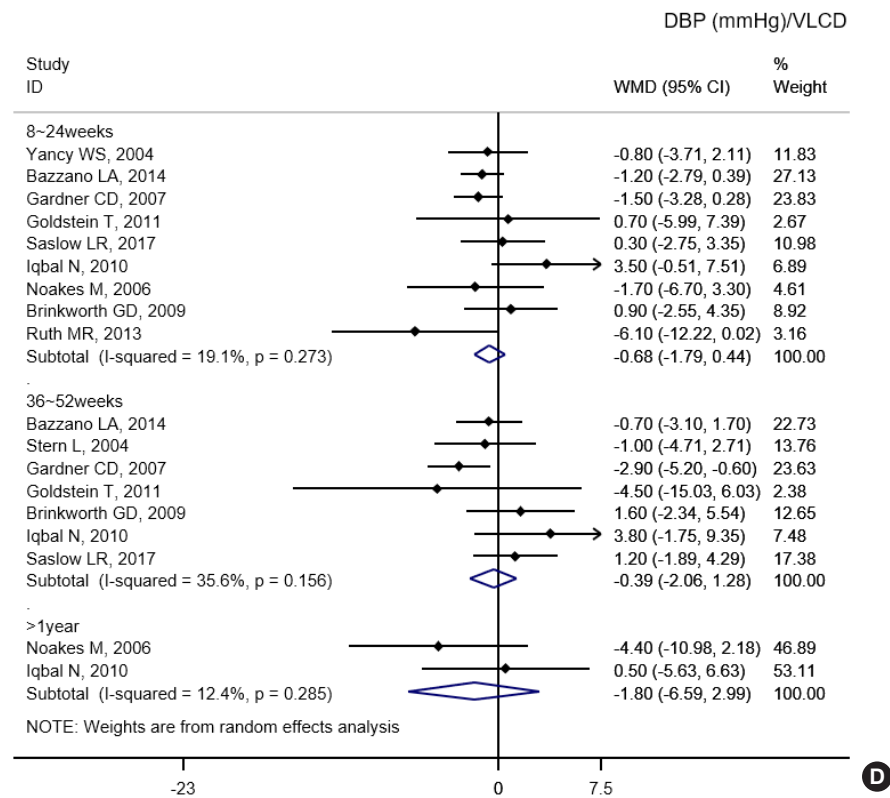

Supplementary Fig. 8. Continued.
