# Supplementary material for: Effect of Carbohydrate-Restricted Diets and Intermittent Fasting on Obesity, Type 2 Diabetes Mellitus, and Hypertension Management: Consensus Statement of the Korean Society for the Study of Obesity, Korean Diabetes Association, and Korean Society of Hypertension
Source: PubMed Central journal article supplement — Diabetes Metab J. 2022 May 25;46(3):355–76. doi: 10.4093/dmj.2022.0038 (PMC9171155; doi:10.4093/dmj.2022.0038), 2022-05-25
Supplement: dmj-2022-0038-suppl36.pdf [file dmj-2022-0038-suppl36.pdf]

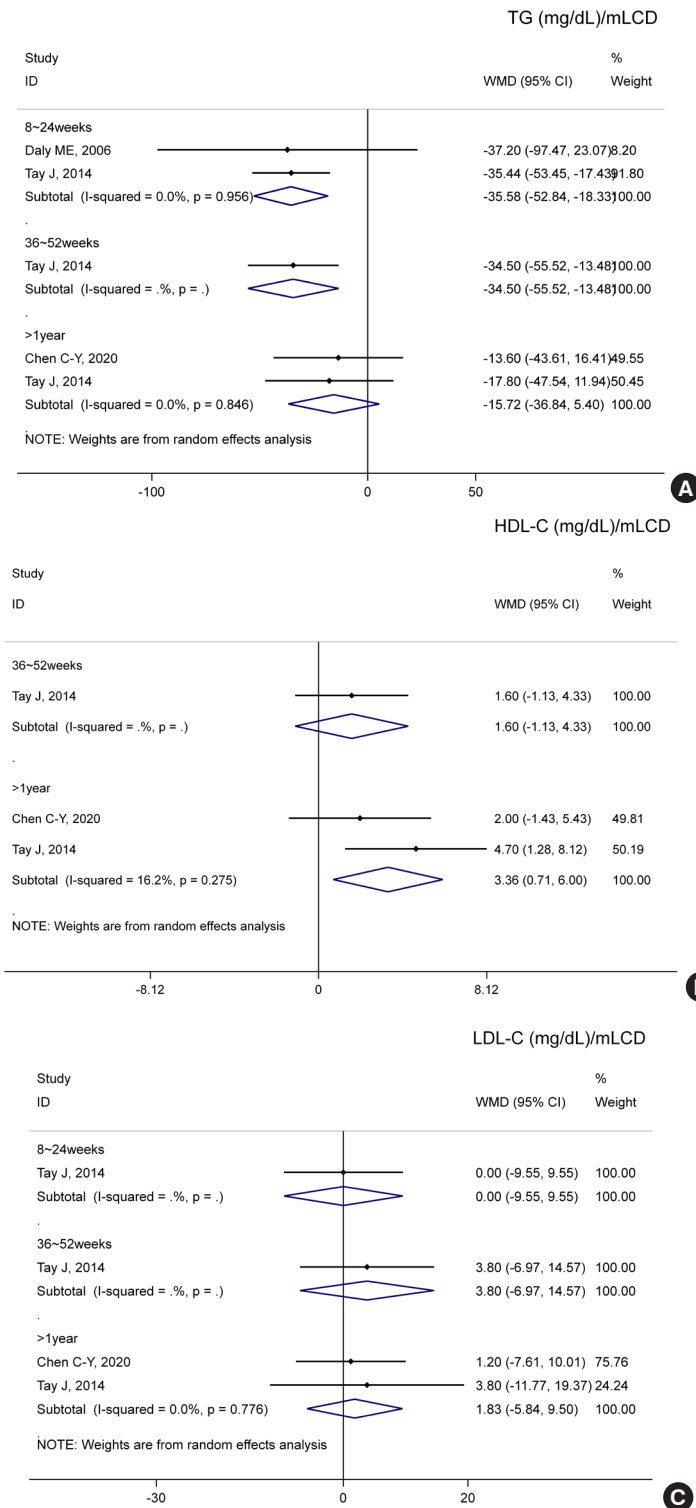

**Supplementary Fig. 25.** Effects of carbohydrate-restricted diets on lipid profile in adults with hypertension. (A) Moderately-low or low carbohydrate diets (mLCD) on triglyceride (TG). (B) mLCD on high-density lipoprotein cholesterol (HDL-C). (C) mLCD on low-density lipoprotein cholesterol (LDL-C). (D) Very-low carbohydrate diets (VLCD) on TG. (E) VLCD on HDL-C. (F) VLCD on LDL-C. WMD, weighted mean difference; CI, confidence interval. *(Continued to the next page)*

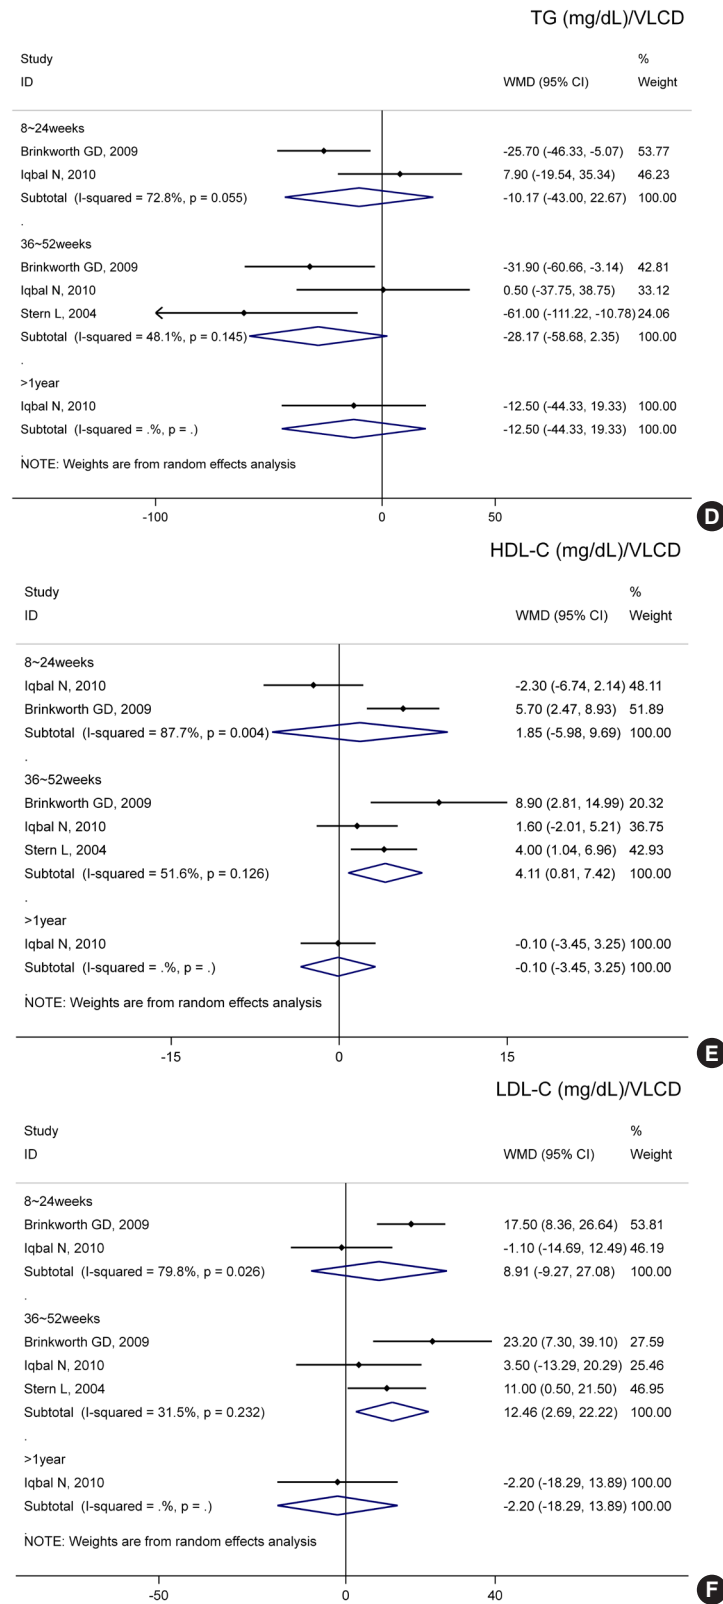

Supplementary Fig. 25. Continued.
